# Supplementary material for: TYROBP/DAP12 knockout in Huntington’s disease Q175 mice cell-autonomously decreases microglial expression of disease-associated genes and non-cell-autonomously mitigates astrogliosis and motor deterioration
Source: PubMed Central journal article supplement (PMC10924371; doi:10.1186/s12974-024-03052-4), 2024-03-08
Supplement: 12974_2024_3052_MOESM1_ESM.pdf [file 12974_2024_3052_MOESM1_ESM.pdf]

A

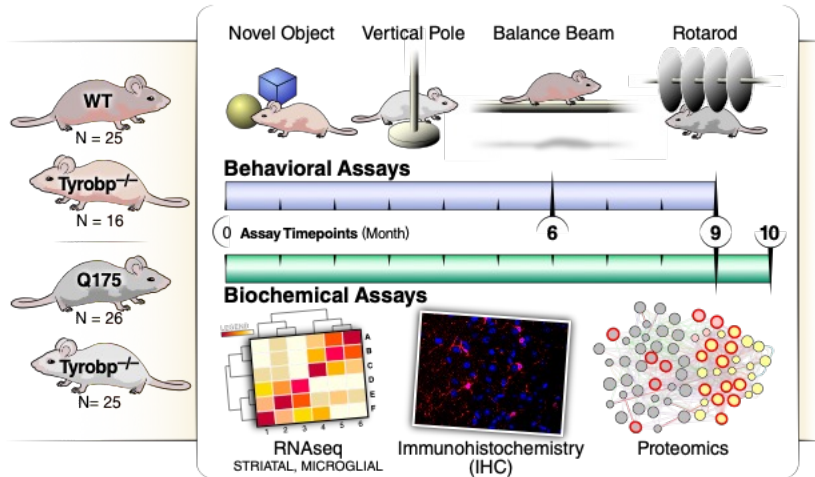

B

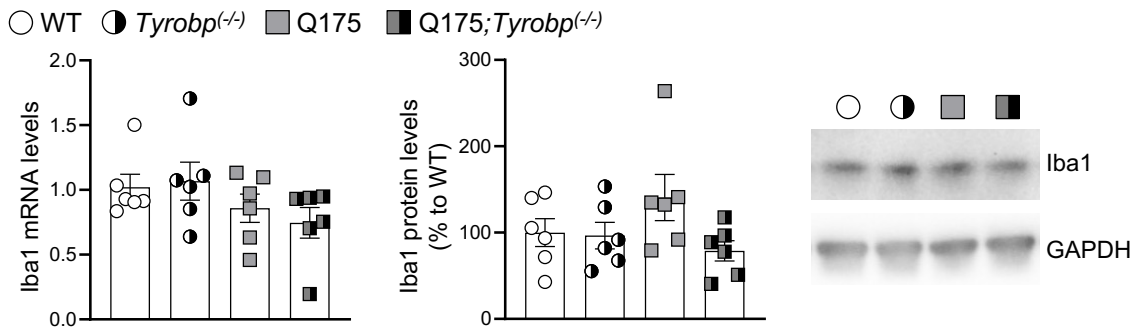

**Supplementary Fig. 1.** (A) Schematic of the biochemical and behavioral studies on WT and Q175 mice with and without *Tyrobp*. (B) RT-qPCR of *Aif1* (Iba1 gene) mRNA (left) and WB of Iba1 protein (right) in the striatum of WT and Q175 mice with and without *Tyrobp* (10 months of age), n = 6 mice per group. Each point represents data from an individual mouse.

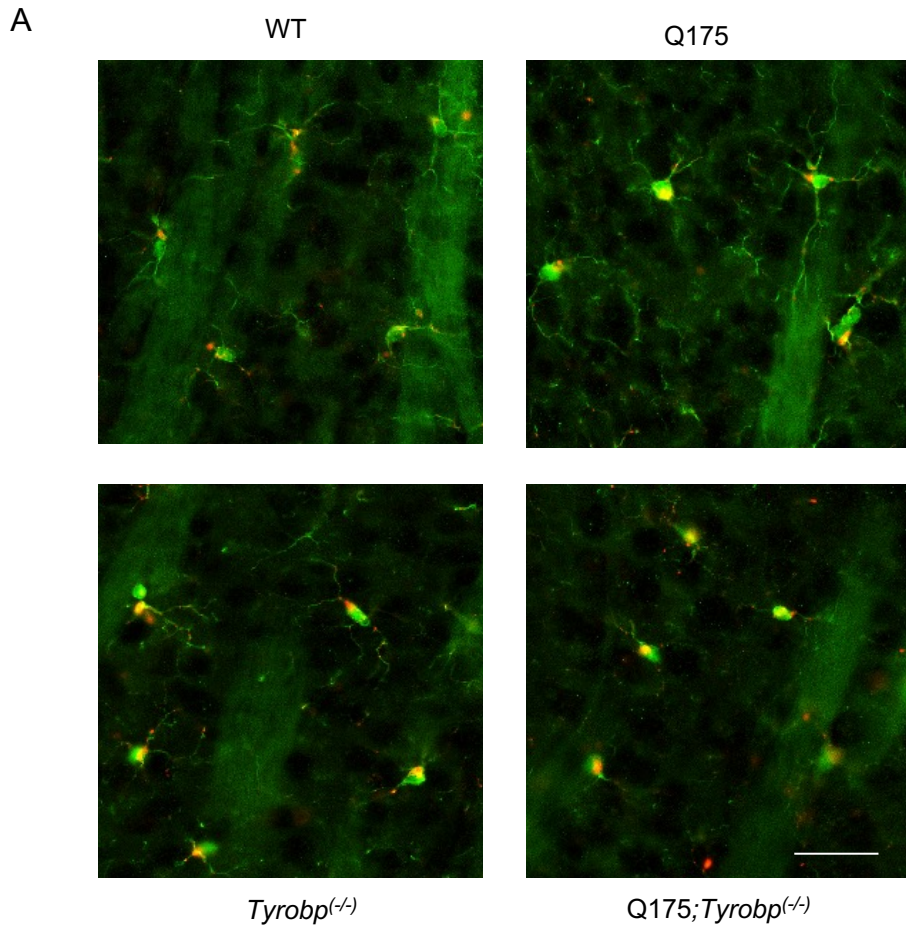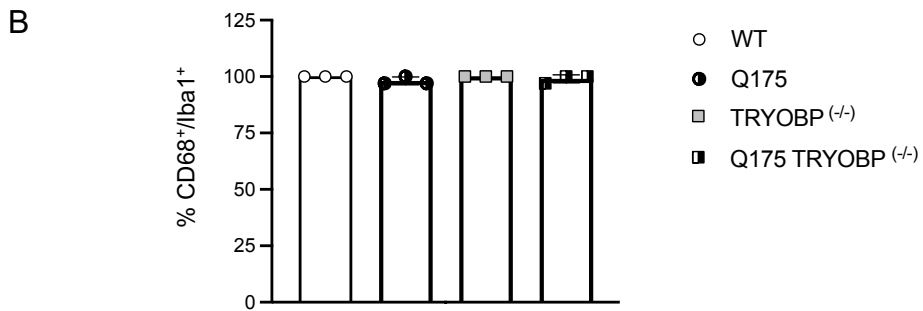

**Supplementary Fig. 2.** (A) Representative immunofluorescent images of CD68 cells colabeled with Iba1. Virtually all cells were double-labeled in all genotypes. (B) Quantification of the CD68<sup>+</sup> cells were positive for Iba1<sup>+</sup> cells. Averaged number of CD68<sup>+</sup> cells were positive for Iba1<sup>+</sup> cells from three fields from 3 different striatal sections is represented per group as mean ± SEM (WT n = 3; Q175 n = 3; *Tyrobp<sup>-/-</sup>* n = 3; Q175;*Tyrobp<sup>-/-</sup>* n = 3). Each point represents data from an individual mouse. Scale bar = 5 μm.

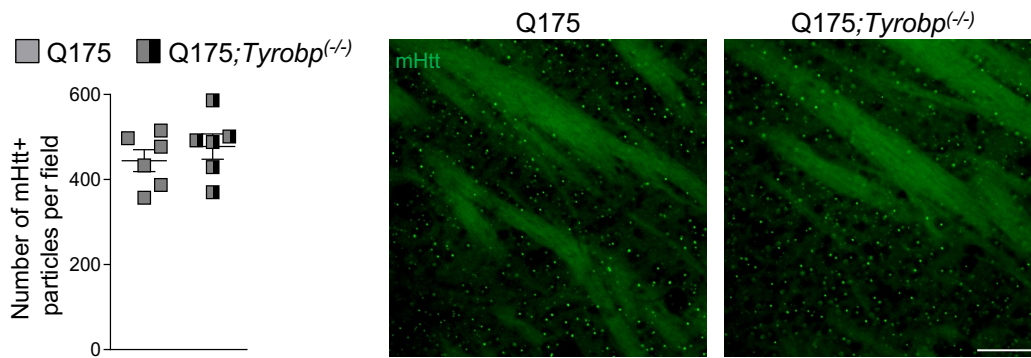

**Supplementary Fig. 3.** Number of mHtt<sup>+</sup> particles was evaluated in the dorsal striatum of Q175 mice at 9 months of age. Averaged number of mHtt<sup>+</sup> particles from four fields from 3 different striatal sections is represented per group as mean  $\pm$  SEM (Q175 n = 6; Q175;Tyrobp<sup>(-/-)</sup> n = 6). Each point represents data from an individual mouse. Scale bar = 50  $\mu$ m.

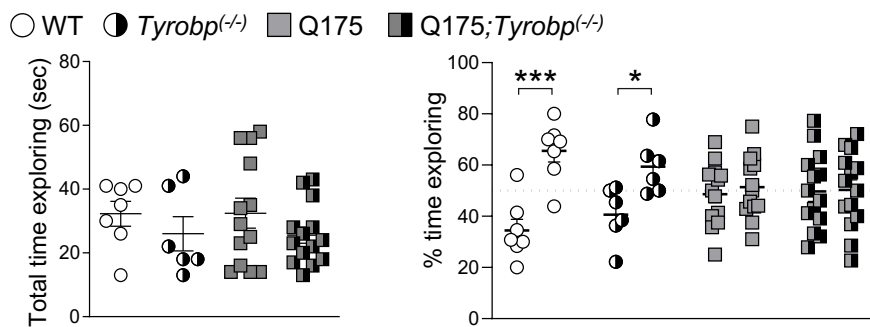

**Supplementary Fig. 4.** Cognitive behavior was evaluated in Q175 mice at 9 months of age using the Novel Object Recognition test (NOR). Time exploring and percentage exploring each arm is represented per group as mean  $\pm$  SEM (WT n = 7; *Tyrobp*<sup>-/-</sup> n = 6; Q175 n = 13; Q175;*Tyrobp*<sup>-/-</sup> = 14). Each point represents data from an individual mouse. Statistical analysis was performed unpaired t-test comparing old vs new arm. \*p < 0.05; \*\*\*p < 0.001.

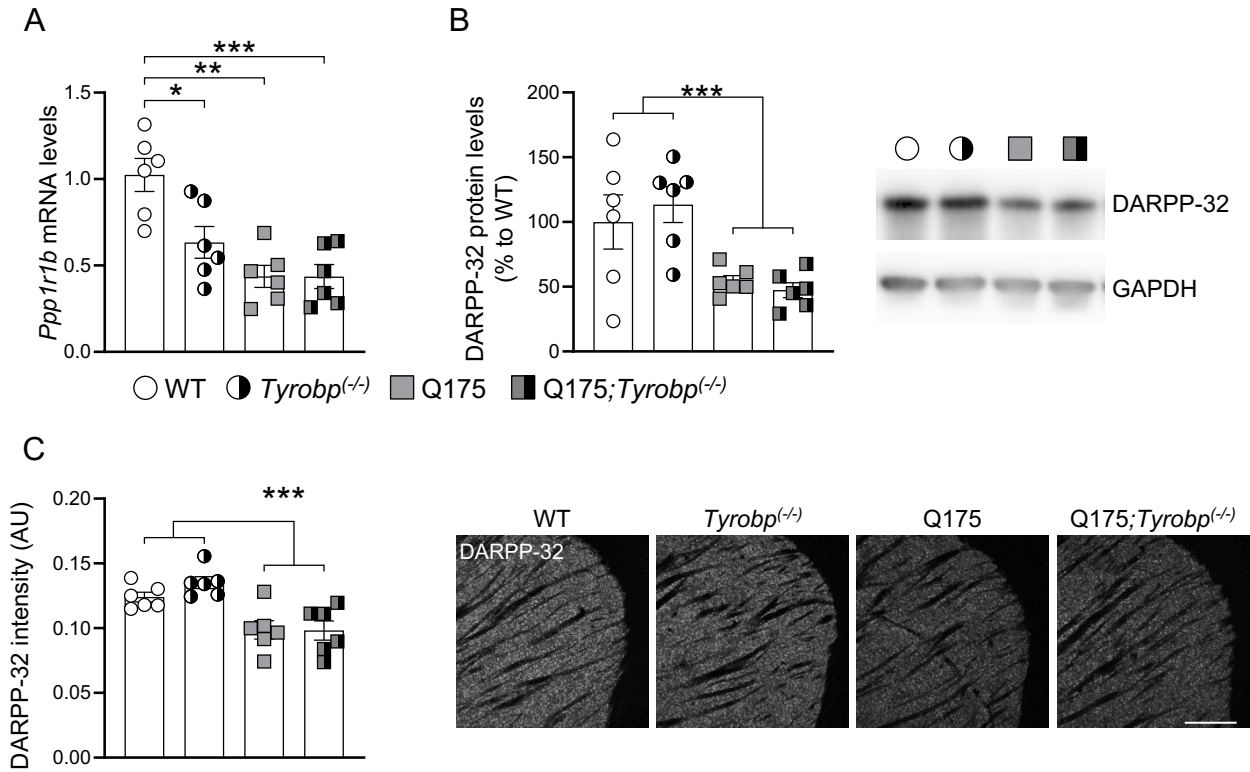

**Supplementary Fig. 5.** (A) RT-qPCR, (B) WB and (C) immunofluorescence analysis of DARPP-32 in the striatum of WT and Q175 mice with and without *Tyrobp* (10 months of age), n = 6 mice per group. Data represent the mean ± SEM. Each point represents data from an individual mouse. Two-way ANOVA followed by Bonferroni's post hoc test, \*p < 0.05; \*\*p < 0.01; \*\*\*p < 0.001. Scale bar = 200 μm.

○ WT ● *Tyrobp*<sup>-/-</sup> ■ Q175 ■ Q175;*Tyrobp*<sup>-/-</sup>

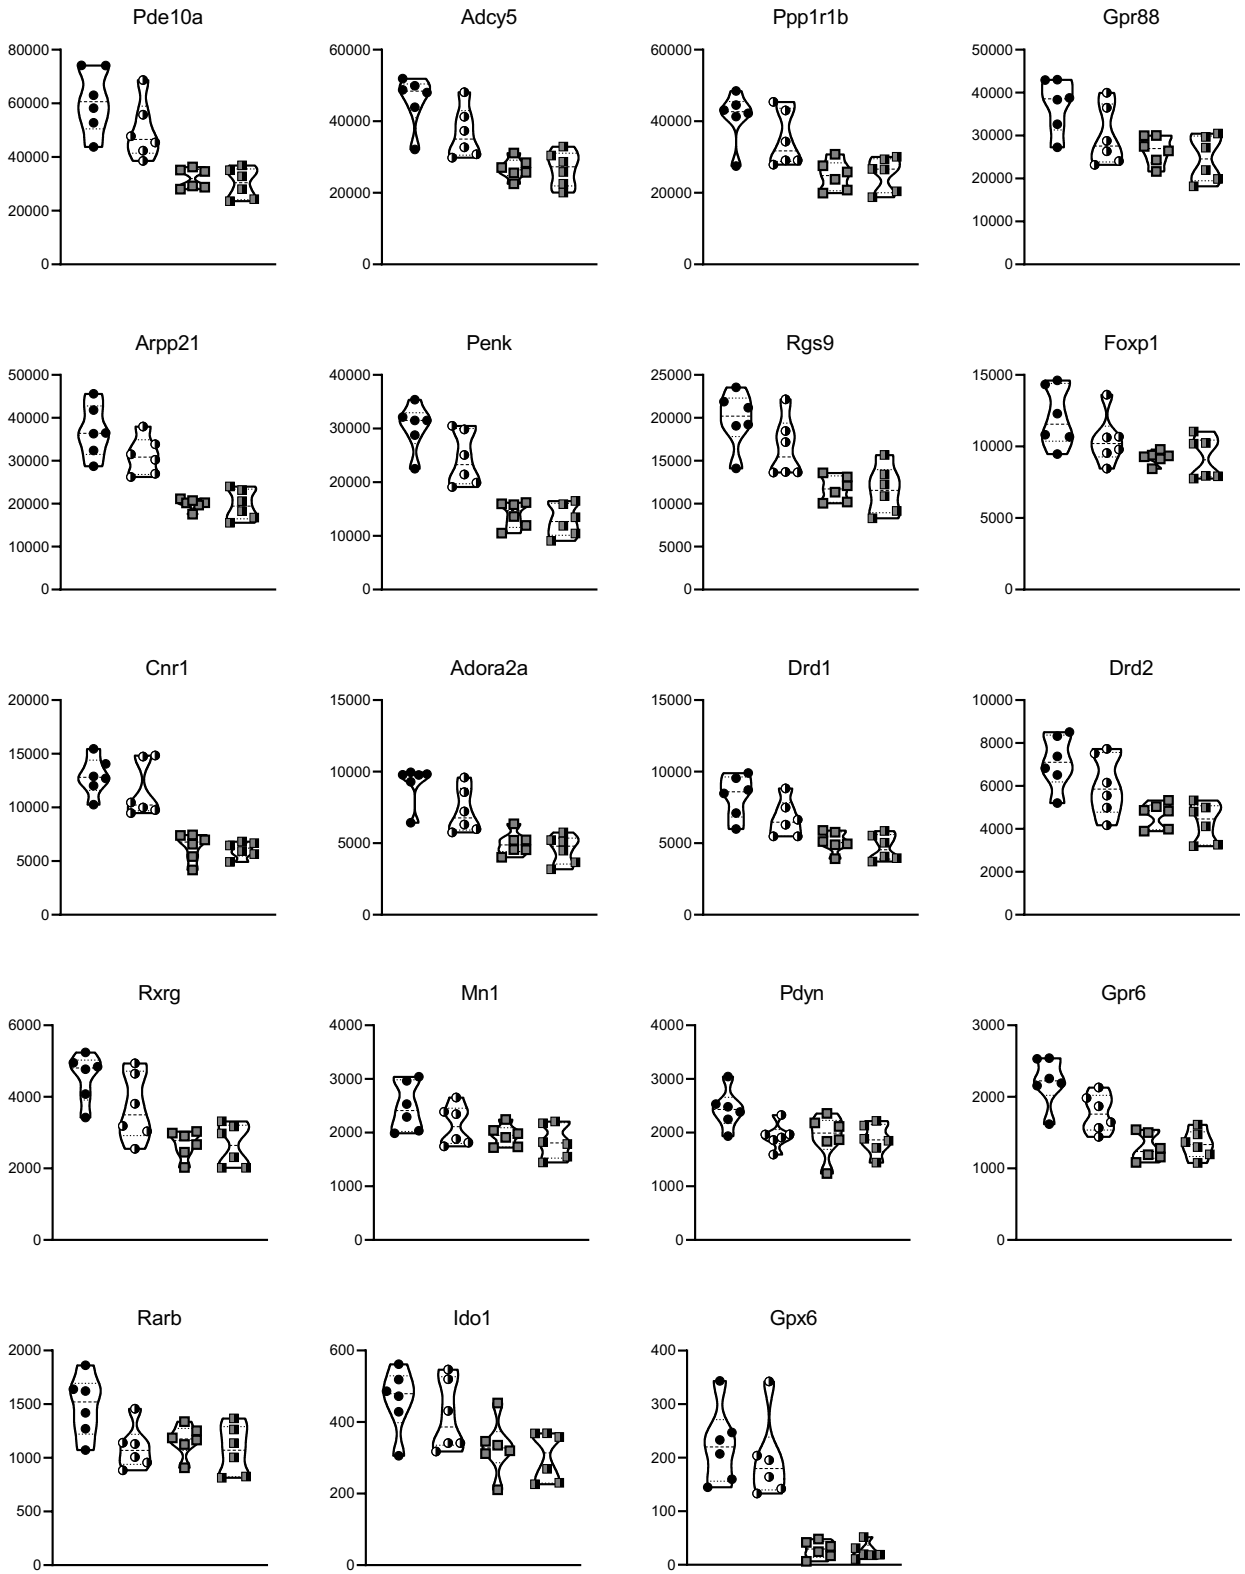

**Supplementary Fig. 6.** Normalized counts of striatal-specific genes detected in the striatum of WT and Q175 mice with and without *Tyrobp* (10 months of age) by bulk RNAseq, n = 6 mice per group.

A

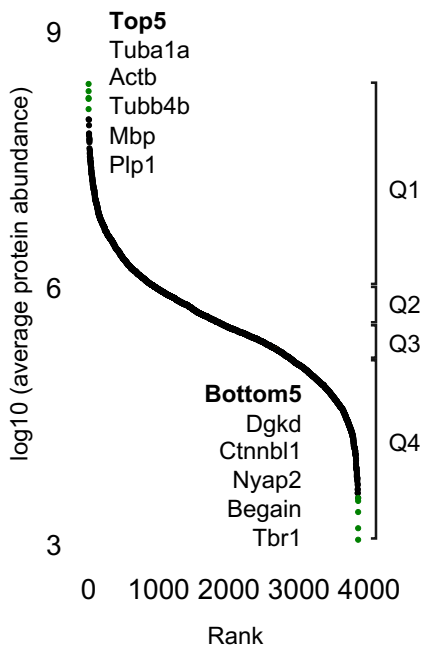

B

| Quartile | GO Biological Process 2021             | FDR       | OR    |
|----------|----------------------------------------|-----------|-------|
| Q1:      | aerobic electron transport chain       | 1.403E-35 | 33.1  |
| Q2:      | cytoplasmic translation                | 1.677E-22 | 14.26 |
| Q3:      | post-Golgi vesicle-mediated transport  | 4.992E-07 | 6.63  |
| Q4:      | mitochondrial translational elongation | 2.689E-10 | 7.94  |

  

| Quartile | GO Cellular Component 2021        | FDR       | OR    |
|----------|-----------------------------------|-----------|-------|
| Q1:      | focal adhesion                    | 2.217E-51 | 8.67  |
| Q2:      | cytosolic large ribosomal subunit | 5.144E-14 | 14.61 |
| Q3:      | late endosome                     | 3.342E-07 | 3.98  |
| Q4:      | mitochondrial inner membrane      | 0.0001579 | 2.67  |

**Supplementary Fig. 7.** (A) Ranking of brain proteins by normalized protein abundance from highest to lowest. (B) Top enrichment for each quartile is displayed for GO categories “biological process” and “cellular component”; FDR, Benjamini-Hochberg-corrected false discovery rate. OR, Odds Ratio.

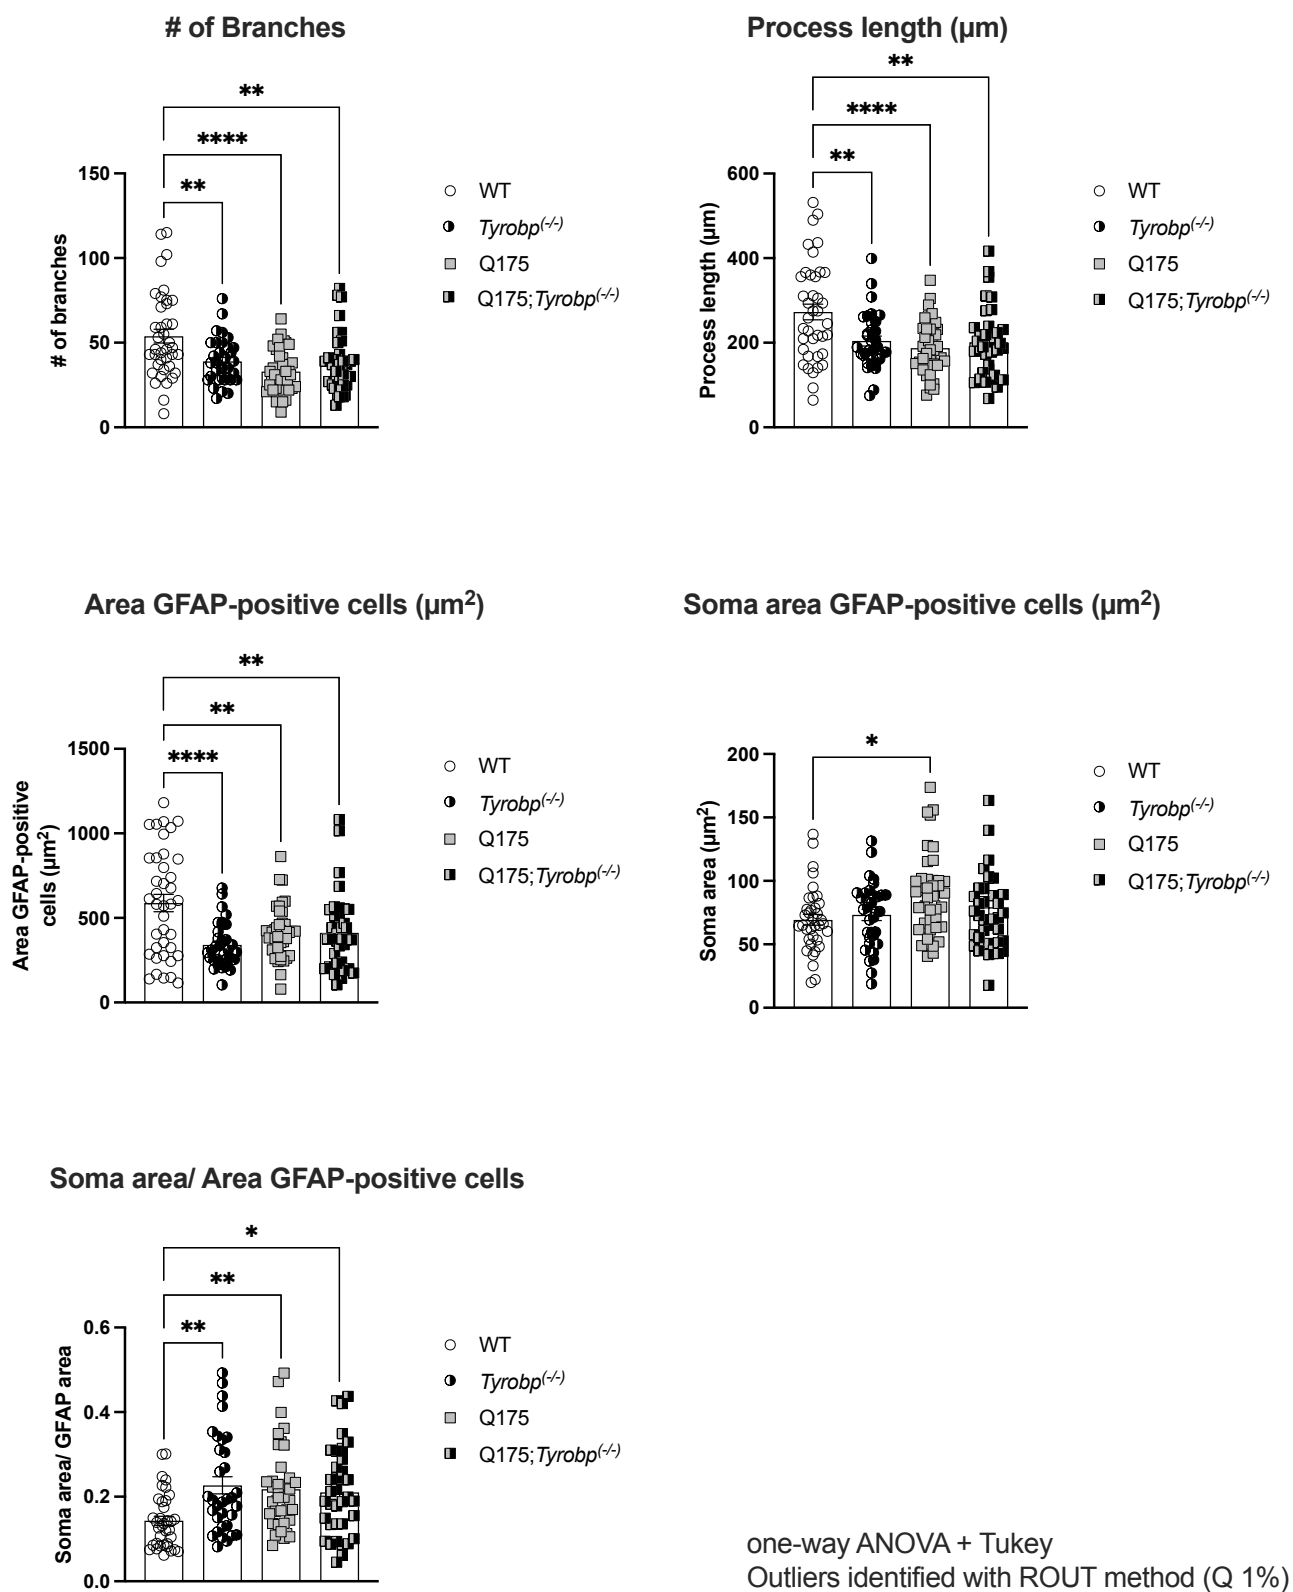

**Supplementary Fig. 8.** Quantification of the morphology of GFAP cells in the striatum of WT and Q175 mice with and without *Tyrobp*.
